# Supplementary material for: Effects of liquid cultivation on gene expression and phenotype of C. elegans
Source: PubMed Central journal article supplement (PMC6069985; doi:10.1186/s12864-018-4948-7), 2018-07-31
Supplement: 12864_2018_4948_MOESM1_ESM.pdf [file 12864_2018_4948_MOESM1_ESM.pdf]

1 **Effects of liquid cultivation on gene expression and phenotype of *C. elegans***

2  
3  
4 İrem Çelen<sup>a,b</sup>, Jung H. Doh<sup>b</sup>, and Chandran R. Sabanayagam<sup>b,1</sup>

5  
6  
7 <sup>a</sup>Center for Bioinformatics and Computational Biology, University of Delaware, Newark, DE, USA, 19711

8 <sup>b</sup>Delaware Biotechnology Institute, University of Delaware, Newark, DE, USA, 19711

9  
10  
11  
12  
13 <sup>1</sup>Corresponding author:  
14 Chandran R. Sabanayagam  
15 Delaware Biotechnology Institute  
16 University of Delaware  
17 15 Innovation Way, Newark, DE 19711  
18 Telephone: (302) 831-1691  
19 E-mail: [chandran@udel.edu](mailto:chandran@udel.edu)

20  
21  
22  
23  
24  
25 Contact information of authors:  
26 İrem Çelen : [irem@udel.edu](mailto:irem@udel.edu)  
27 Jung H. Doh: [jdoh@udel.edu](mailto:jdoh@udel.edu)  
28 Chandran R. Sabanayagam: [chandran@udel.edu](mailto:chandran@udel.edu)

29  
30  
31  
32  
33 **Keywords:** Dormant genes, ncRNA, adaptation, reaction norm



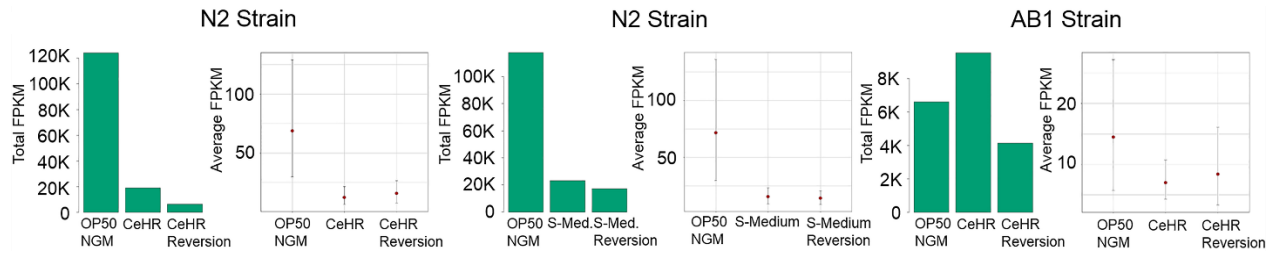

54

55 **Fig. S2:** The gene expression trends in response to environmental changes vary between the strains  
 56 N2 strain shows an overall decrease in transcripts when exposed to environmental changes.

57

58

59

60

61

62

63

64

65

66

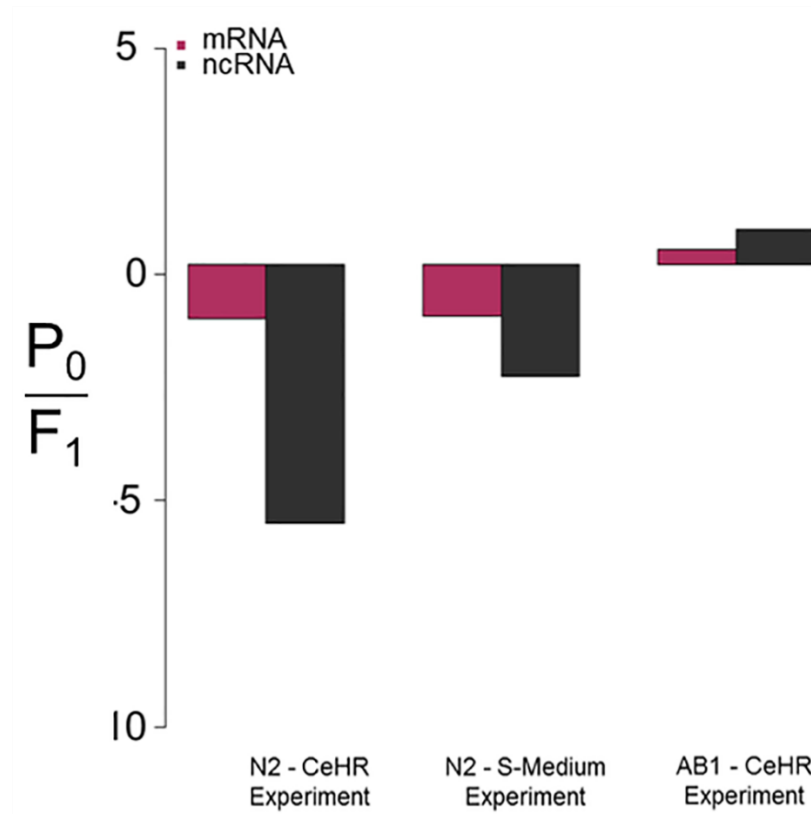

67  
68  
69  
70  
71  
72  
73  
74  
75  
76  
77  
78  
79  
80  
81  
82  
83  
84  
85  
86  
87  
88  
89  
90  
91

**Fig. S3:** The ratio of the expressed mRNA and ncRNA molecules between the  $P_0$  and  $F_1$  generations. Both the molecules in the N2 strain show a decrease in response to the environmental changes. In comparison to the decrease in mRNA levels, the proportion of expressed ncRNA molecules are lower under exposure to environmental changes.

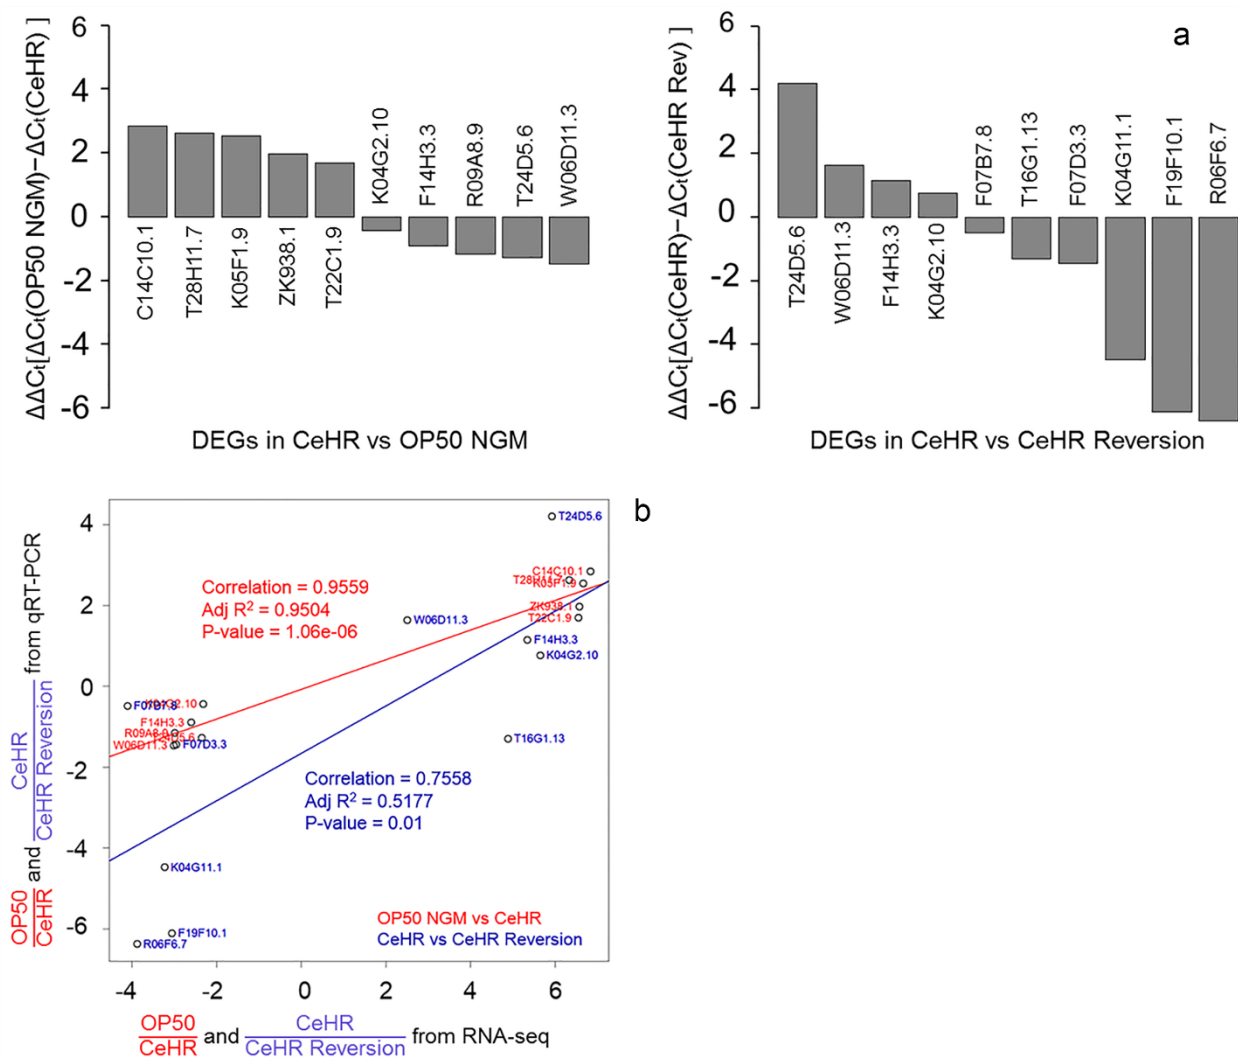

92  
 93  
 94 **Fig. S4:** Quantitative Real Time PCR (qRT-PCR) Analysis of differentially expressed RNA. (a)  
 95 qRT-PCR were conducted with total RNA extracted from N2 animals in grown on OP50 NGM,  
 96 CeHR and CeHR Reversion (back onto OP50 NGM). All genes, with the exception of T16G1.13,  
 97 analyzed via qRT-PCR were consistent with the RNA-seq data and analysis of the differential gene  
 98 expression. (b) Pearson correlation of the qRT-PCR and RNA-seq data.  
 99

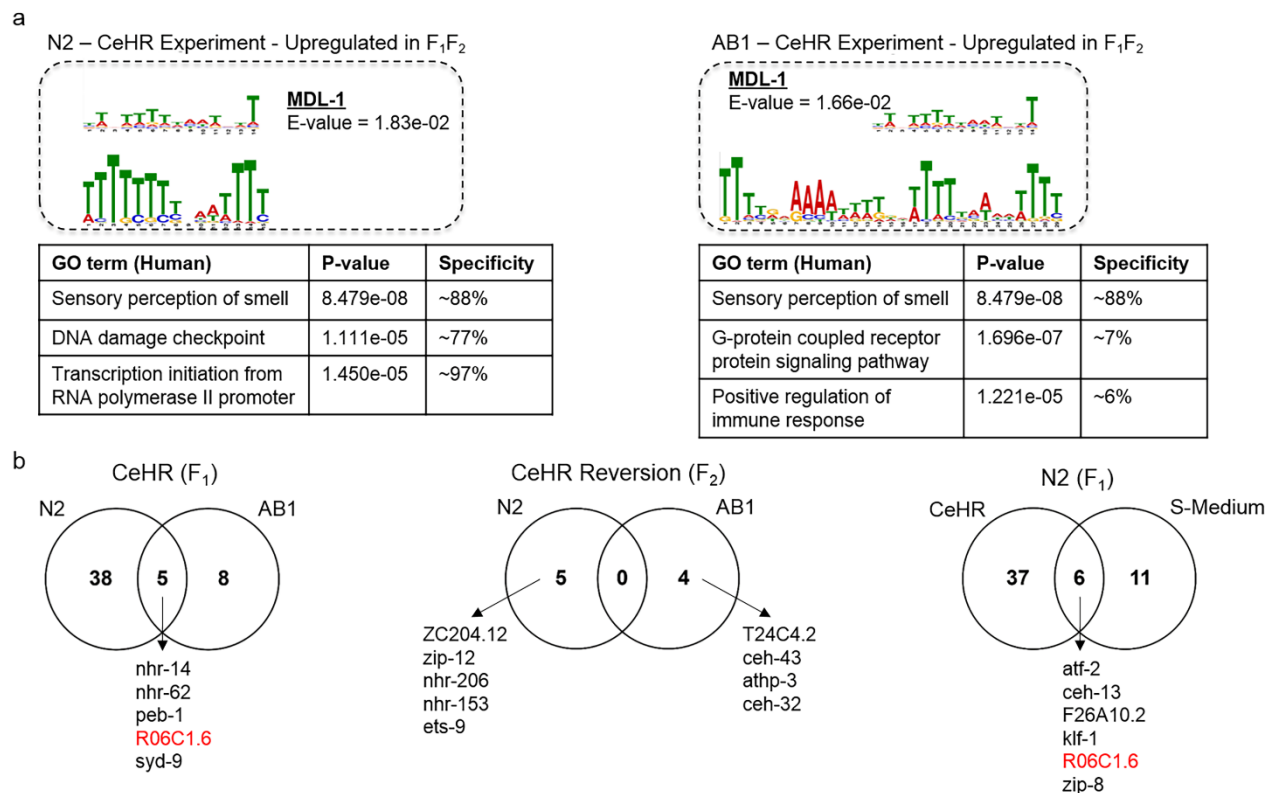

100  
101  
102  
103  
104  
105  
106  
107  
108  
109  
110  
111  
112  
113  
114  
115  
116  
117  
118  
119  
120  
121  
122  
123  
124  
125

**Fig. S5:** Putative transcription factors functioning in response to environmental changes in N2 and AB1. **(a)** One motif from each strain showed enrichment as a recognition site for transcription factor MDL-1. The same sequence motifs demonstrated differences for the overrepresented biological functions in human. **(b)** Venn diagrams depicting the overlap of the differentially expressed transcription factors between environmental conditions or strains. The overlap between the F<sub>1</sub> generations are statistically significant (Hypergeometric test,  $P$ -value < 0.0001)

126

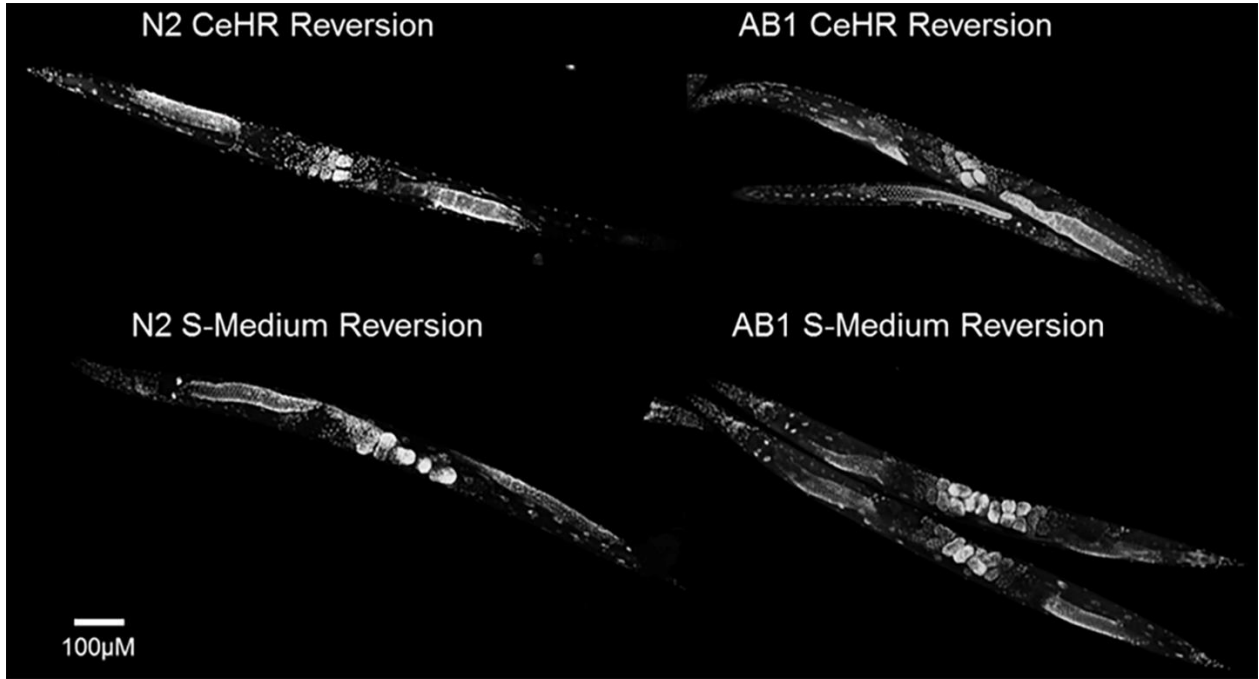

127

128

129

130

131

**Fig. S6:** F2 N2 and AB1 *C. elegans* that were reverted back onto OP50 NGM exhibit normal germ lines. N2 and AB1 animals were placed back onto OP50 NGM agar plates from CeHR or S-Medium. Adult hermaphrodites were stained with DAPI to visualize germ cell nuclei. All germ line exhibit normal germ cell morphologies and number.

132

133

134

135

136

137

138

139

140

141

142

143

144

145

146

147

148

149

150

151

152

153

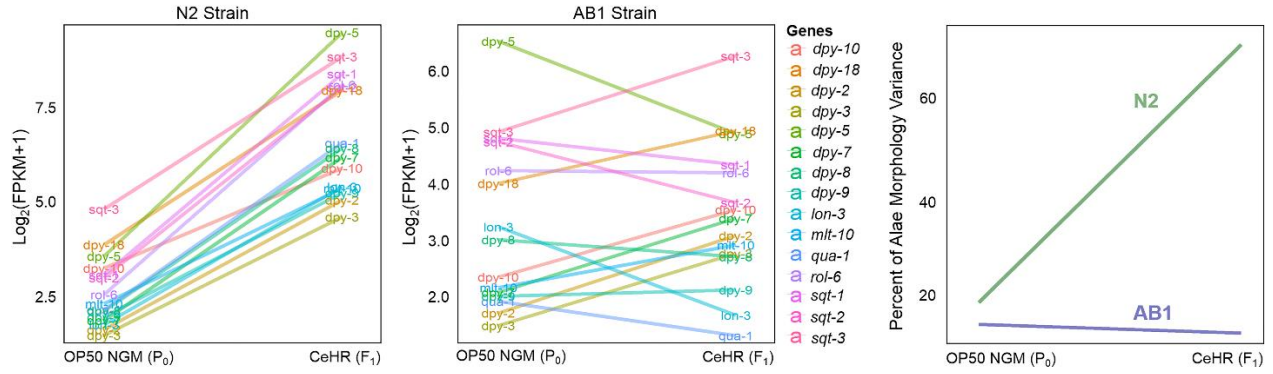

154

155 **Fig. S7:** Norm of reaction between the alae morphology variant annotated genes and the detected alae  
 156 morphology variance between AB1 and N2 indicating a potential role for these genes in the observed  
 157 phenotype.

158

159

160

161

162

163

164

165

166

167

168

169

170

171

172

173

174

175

176



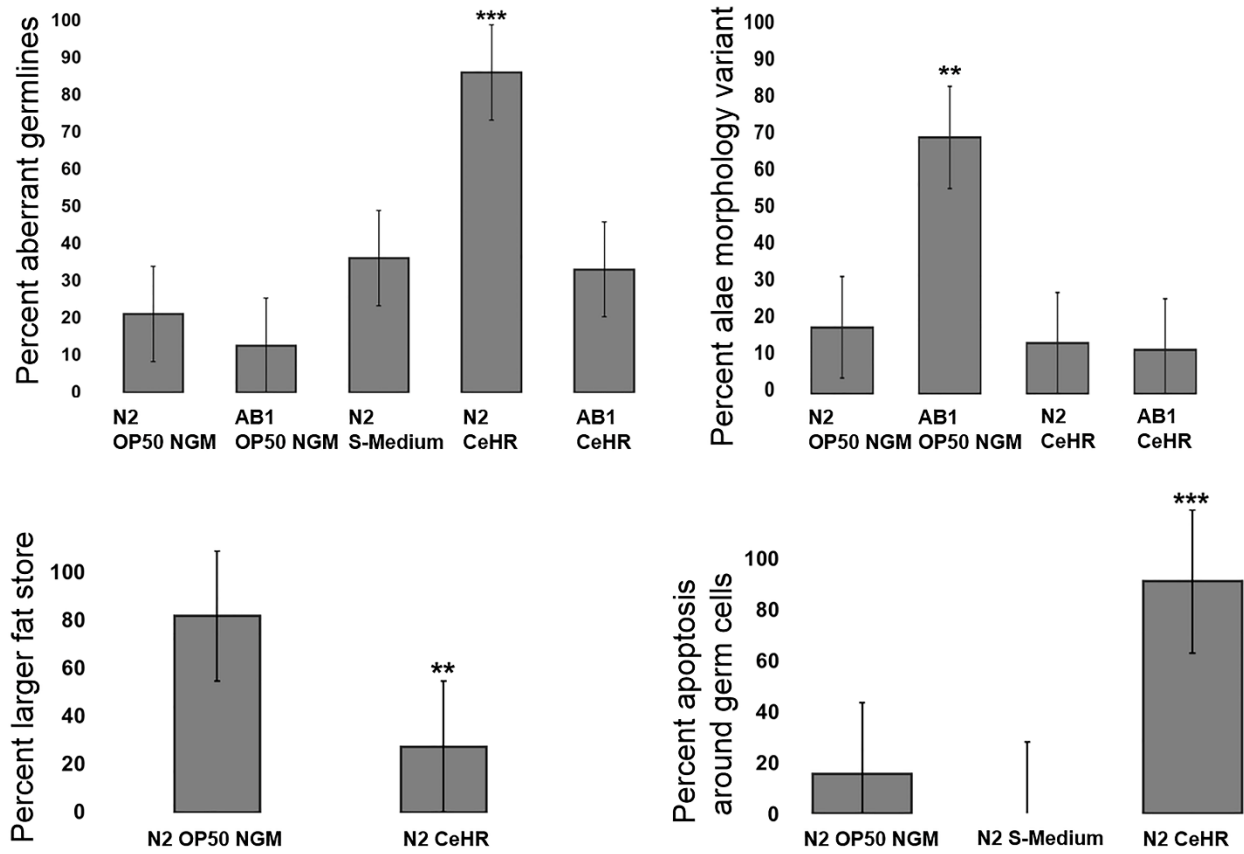

177

178 **Fig. S8:** Quantitative differences in the observed phenotypes in liquid cultivations. T-test was used to  
 179 compare the conditions. Error bars represent the standard error. \*\*:  $P$ -value  $< 0.01$ , \*\*\*:  $P$ -value  $<$   
 180  $0.0001$ .  $P$ -value  $> 0.05$  is not reported.

181

182

183

184

185

186

187

188

189

190

191

192

193

194 **Supplementary Tables**195 **Table S1: Sequencing read information for the RNA-seq libraries**

| Strain | Condition          | Replicate | Generation | Stage       | Number of Reads | Mapped Reads       |
|--------|--------------------|-----------|------------|-------------|-----------------|--------------------|
| N2     | Agar (OP50 NGM)    | 1         | P0         | Young adult | 19,785,469      | 19,033,093 (96.2%) |
| N2     | Agar (OP50 NGM)    | 2         | P0         | Young adult | 17,804,139      | 17,078,192 (95.9%) |
| N2     | Agar (OP50 NGM)    | 3         | P0         | Young adult | 17,584,017      | 16,792,356 (95.5%) |
| N2     | CeHR               | 1         | F1         | Young adult | 29,616,506      | 27,904,230 (94.2%) |
| N2     | CeHR               | 2         | F1         | Young adult | 30,144,650      | 28,728,679 (95.3%) |
| N2     | CeHR               | 3         | F1         | Young adult | 29,749,460      | 27,582,792 (92.7%) |
| N2     | CeHR Reversion     | 1         | F2         | Young adult | 25,771,272      | 24,627,700 (95.6%) |
| N2     | CeHR Reversion     | 2         | F2         | Young adult | 49,360,215      | 46,951,509 (95.1%) |
| N2     | CeHR Reversion     | 3         | F2         | Young adult | 6,524,144       | 6,256,402 (95.9%)  |
| N2     | S-Medium           | 1         | F1         | Young adult | 24,031,853      | 22,294,902 (92.8%) |
| N2     | S-Medium           | 2         | F1         | Young adult | 25,924,449      | 22,848,853 (88.1%) |
| N2     | S-Medium           | 3         | F1         | Young adult | 26,580,009      | 19,716,312 (74.2%) |
| N2     | S-Medium Reversion | 1         | F2         | Young adult | 21,340,354      | 20,685,738 (96.9%) |
| N2     | S-Medium Reversion | 2         | F2         | Young adult | 2,824,111       | 2,727,187 (96.6%)  |
| N2     | S-Medium Reversion | 3         | F2         | Young adult | 49,930,813      | 47,900,763 (95.9%) |
| AB1    | Agar (OP50 NGM)    | 1         | P0         | Young adult | 21,217,270      | 20,230,031 (95.3%) |
| AB1    | Agar (OP50 NGM)    | 2         | P0         | Young adult | 16,180,777      | 15,393,012 (95.1%) |
| AB1    | Agar (OP50 NGM)    | 3         | P0         | Young adult | 25,889,871      | 24,612,562 (95.1%) |
| AB1    | CeHR               | 1         | F1         | Young adult | 15,358,876      | 14,477,230 (94.3%) |

196

**Table S1 Cont.**

|     |                |   |    |             |            |                    |
|-----|----------------|---|----|-------------|------------|--------------------|
| AB1 | CeHR           | 2 | F1 | Young adult | 15,636,461 | 14,762,856 (94.4%) |
| AB1 | CeHR           | 3 | F1 | Young adult | 14,469,569 | 13,649,882 (94.3%) |
| AB1 | CeHR Reversion | 1 | F2 | Young adult | 16,467,847 | 15,708,866 (95.4%) |
| AB1 | CeHR Reversion | 2 | F2 | Young adult | 17,444,758 | 16,618,698 (95.3%) |
| AB1 | CeHR Reversion | 3 | F2 | Young adult | 22,730,048 | 21,629,136 (95.2%) |

197

198

199

200

201

202

203

204

205

206

207

208

209

210

211

212

213

214

215

216

217

218

219

220

221

222

223

224

225

226

227

228

229

230

231

232 **Table S2: Raw data from the qRT-PCR analysis.**

| Condition Being Compared | Gene     | Control Ct Ave (W)        | Gene Ct Ave (X) | $\Delta Ct Ave [X - W] = Y$ | $\Delta \Delta Ct Agar(1)$ | CeHR        | Agar       | log2 (fold change)        | test_stat        | p-value        | q-value        | significant        |
|--------------------------|----------|---------------------------|-----------------|-----------------------------|----------------------------|-------------|------------|---------------------------|------------------|----------------|----------------|--------------------|
| Agar Vs CeHR             | C14C10.1 | 18.5907<br>Ref in<br>Agar | 28.312          | 9.7209                      | 2.8454                     | 53.43       | 0.79       | -6.0817                   | -9.74            | 5.00E-05       | 0.0001         | yes                |
|                          | ZK938.1  |                           | 26.662          | 8.0712                      | 1.9718                     | 57.85       | 0.94       | -5.94209                  | -10.9            | 0.00005        | 0.0001         | yes                |
|                          | K05F1.9  |                           | 28.137          | 9.5467                      | 2.5496                     | 35.47       | 0.38       | -6.53104                  | -6.03            | 0.00035        | 0.0009         | yes                |
|                          | T22C1.9  |                           | 27.261          | 8.6707                      | 1.6922                     | 19.04       | 0.34       | -5.79727                  | -5.1             | 0.0007         | 0.0018         | yes                |
|                          | T28H11.7 |                           | 27.092          | 8.5009                      | 2.6266                     | 21.48       | 0.45       | -5.56923                  | -5.3             | 0.00015        | 0.0004         | yes                |
|                          | K04G2.10 |                           | 26.962          | 8.371                       | -0.4372                    | 1.589       | 12         | 2.9119                    | 6.228            | 0.00005        | 0.0001         | yes                |
|                          | T24D5.6  |                           | 31.669          | 13.0784                     | -1.2758                    | 3.406       | 21.4       | 2.64955                   | 3.479            | 0.0002         | 0.0006         | yes                |
|                          | W06D11.3 |                           | 26.274          | 7.6829                      | -1.4629                    | 3.163       | 42.6       | 3.75117                   | 8.961            | 0.00005        | 0.0001         | yes                |
|                          | F14H3.3  |                           | 26.788          | 8.1968                      | -0.8978                    | 2.395       | 20.8       | 3.1156                    | 7.922            | 0.00005        | 0.0001         | yes                |
|                          | R09A8.9  |                           | 29.397          | 10.8058                     | -1.1607                    | 23.99       | 153        | 2.67018                   | 2.623            | 0.00145        | 0.0035         | yes                |
|                          | C14C10.1 | 19.1111<br>Ref in<br>CeHR | 25.987          | 6.8755                      | -2.8454                    | 53.43       | 0.79       | -6.0817                   | -9.74            | 5.00E-05       | 0.0001         | yes                |
|                          | ZK938.1  |                           | 25.211          | 6.0994                      | -1.9718                    | 57.85       | 0.94       | -5.94209                  | -10.9            | 0.00005        | 0.0001         | yes                |
|                          | K05F1.9  |                           | 26.108          | 6.9971                      | -2.5496                    | 35.47       | 0.38       | -6.53104                  | -6.03            | 0.00035        | 0.0009         | yes                |
|                          | T22C1.0  |                           | 26.09           | 6.9785                      | -1.6922                    | 19.04       | 0.34       | -5.79727                  | -5.1             | 0.0007         | 0.0018         | yes                |
|                          | T28H11.7 |                           | 24.985          | 5.8743                      | -2.6266                    | 21.48       | 0.45       | -5.56923                  | -5.3             | 0.00015        | 0.0004         | yes                |
|                          | K04G2.10 |                           | 27.919          | 8.8082                      | 0.4372                     | 1.589       | 12         | 2.9119                    | 6.228            | 0.00005        | 0.0001         | yes                |
|                          | T24D5.6  |                           | 33.465          | 14.3542                     | 1.2758                     | 3.406       | 21.4       | 2.64955                   | 3.479            | 0.0002         | 0.0006         | yes                |
|                          | W06D11.3 |                           | 28.257          | 9.1458                      | 1.4629                     | 3.163       | 42.6       | 3.75117                   | 8.961            | 0.00005        | 0.0001         | yes                |
|                          | F14H3.3  |                           | 28.206          | 9.0946                      | 0.8978                     | 2.395       | 20.8       | 3.1156                    | 7.922            | 0.00005        | 0.0001         | yes                |
|                          | R09A8.9  |                           | 31.078          | 11.9665                     | 1.1607                     | 23.99       | 153        | 2.67018                   | 2.623            | 0.00145        | 0.0035         | yes                |
|                          |          |                           |                 |                             |                            | <b>CeHR</b> | <b>Rev</b> | <b>log2 (fold change)</b> | <b>test_stat</b> | <b>p-value</b> | <b>q-value</b> | <b>significant</b> |
| CeHR Vs Rev              | R06F6.7  | 19.1111<br>Ref in<br>CeHR | 26.801          | 7.6894                      | -6.3797                    | 10.69       | 0.73       | -3.8752                   | 4.609            | 4.1E-06        | 2E-05          | yes                |
|                          | F07B7.8  |                           | 35.269          | 16.1582                     | 0.4853                     | 15.64       | 0.91       | -4.10152                  | 6.033            | 1.6E-09        | 1E-08          | yes                |
|                          | K04G11.1 |                           | 35.119          | 16.0075                     | 4.4802                     | 1.292       | 0.14       | -3.22564                  | 2.263            | 0.02365        | 0.0457         | yes                |
|                          | F19F10.1 |                           | 26.422          | 7.3105                      | -6.1145                    | 19.65       | 2.36       | -3.05698                  | 7.443            | 9.8E-14        | 1E-12          | yes                |
|                          | F07D3.3  |                           | 28.599          | 9.488                       | 1.4454                     | 12.49       | 1.62       | -2.94789                  | 6.395            | 1.6E-10        | 1E-09          | yes                |
|                          | T16G1.13 |                           | 28.821          | 9.7096                      | -1.2957                    | 0.263       | 7.76       | 4.88152                   | -2.52            | 0.01173        | 0.0245         | yes                |
|                          | R06F6.7  |                           | 29.703          | 11.0323                     | 6.3797                     | 10.69       | 0.73       | -3.8752                   | 4.609            | 4.1E-06        | 2E-05          | yes                |
|                          | F07B7.8  | 32.74                     | 14.0691         | -0.4853                     | 15.64                      | 0.91        | -4.10152   | 6.033                     | 1.6E-09          | 1E-08          | yes            |                    |
|                          | K04G11.1 | 34.343                    | 15.6729         | -4.4802                     | 1.292                      | 0.14        | -3.22564   | 2.263                     | 0.02365          | 0.0457         | yes            |                    |
|                          | F19F10.1 | 30.198                    | 11.5273         | 6.1145                      | 19.65                      | 2.36        | -3.05698   | 7.443                     | 9.8E-14          | 1E-12          | yes            |                    |
|                          | F07D3.3  | 32.095                    | 13.425          | -1.4454                     | 12.49                      | 1.62        | -2.94789   | 6.395                     | 1.6E-10          | 1E-09          | yes            |                    |
|                          | K04G2.10 | 26.713                    | 8.0426          | -0.7656                     | 1.271                      | 63.7        | 5.64677    | -10.1                     | 0                | 0              | yes            |                    |
|                          | T24D5.6  | 28.821                    | 10.151          | -4.2032                     | 3.406                      | 21.4        | 2.64955    | 3.479                     | 0.0002           | 0.0006         | yes            |                    |
|                          | W06D11.3 | 26.18                     | 7.5094          | -1.6364                     | 3.163                      | 42.6        | 3.75117    | 8.961                     | 0.00005          | 0.0001         | yes            |                    |
| F14H3.3                  | 26.616   | 7.9455                    | -1.1491         | 2.395                       | 20.8                       | 3.1156      | 7.922      | 0.00005                   | 0.0001           | yes            |                |                    |
| T16G1.13                 | 29.676   | 11.0053                   | 1.2957          | 0.263                       | 7.76                       | 4.88152     | -2.52      | 0.01173                   | 0.0245           | yes            |                |                    |

233  
234  
235  
236  
237  
238  
239

240 **Table S3: Oligos for qRT-PCR**

241 C14C10.1  
242 For: 5'- ACC ACA ATC ACC ATC TTC CA -3'  
243 Rev: 5'- CCA TTC CGC ACA AGA CAT AG-3'  
244  
245 ZK938.1  
246 For: 5'- AAT TCG ACA ACA ATG CAG GA-3'  
247 Rev: 5'- ACT TCT CTC ATG GCT GGC TT-3'  
248  
249 K05F1.9  
250 For: 5'- AGC TTG GCG ATG AAG TGA C-3'  
251 Rev: 5'- TGA ATG CAT ACC GAT CCT TG-3'  
252  
253 T22C1.9  
254 For: 5'- AAT TAG GTG CAT TGG GTG AAG-3'  
255 Rev: 5'- CAC CAT GAA CAT CTT CCT TCT T-3'  
256  
257 T28H11.7  
258 For: 5'- CAA GGA CCT TCA CAA GAG CA-3'  
259 Rev: 5'- AAT TCT CAA GGG TGC CAG AG-3'  
260  
261 K04G2.10  
262 For: 5'- GGA CGA GAG GTA CCT GAC AAA-3'  
263 Rev: 5'- CTT CAT CTT CCG ATT CTC ACA T-3'  
264  
265 W06D11.3  
266 For: 5'- AAC GAG CAA CAG GAT GGA G-3'  
267 Rev: 5'- CGA GCT AGA AGT GTC CAC CA-3'  
268  
269 F14H3.3  
270 For: 5'- GAG CGC AAG TTG GAT ATT GA-3'  
271 Rev: 5'- TCT TCC GTC TCC TTC CTA TCA-3'  
272  
273 T24D5.6  
274 For: 5'- GAC GAC AAA GGA TCG GAT G-3'  
275 Rev: 5'- CTG TCC CGG AAC TAT CCA TT-3'  
276  
277 R09A8.9  
278 For: 5'- ATA TGG TGG AGG GAT CAG GA-3'  
279 Rev: 5'- TAG AAA GTC GTC GTC GTC CA-3'  
280  
281 R06F6.7  
282 For: 5'- ACA ATC GTG TGA AGC GAG AT-3'  
283 Rev: 5'- TTG CGA CGA ATA TCA TAG GC-3'  
284  
285 F07B7.8  
286 For: 5'- CAT TCC CAG ATG CAG TTG AC3'  
287 Rev: 5'- GTT AGC GCA TGC TTC GTT T3'  
288  
289

290 K04G11.1  
291 For: 5'- CCT TGT TAC ATG GGC TTT CA-3'  
292 Rev: 5'- TGT GGC AAT GAA TCA AGA GTT-3'  
293  
294 F19F10.1  
295 For: 5'- TCC GTC TTC TGA GCT TCC TT-3'  
296 Rev: 5'- CTT GTG TGG CTT GCT CAT CT-3'  
297  
298 F07D3.3  
299 For: 5'- TCA AAC TCT GGA ATG GGT CA-3'  
300 Rev: 5'- CAG CCT GCA TAC ACT CAT CC-3'  
301  
302 T16G1.13  
303 For: 5'- TGG CAC GTA TCA ACT CGT TT-3'  
304 Rev: 5'- GGC CTG TTG TCA TCT GTG TC-3'  
305  
306 ACT-1  
307 For: 5'- AGC CAT CCT TCT TGG GTA TG-3'  
308 Rev: 5'- ATT CCT GGG TAC ATG GTG GT-3'  
309  
310  
311  
312  
313  
314  
315  
316  
317  
318  
319  
320  
321  
322  
323  
324  
325  
326

327 **Table S4. Gene expression comparison with a previous axenic medium study**

328 (a) Genes downregulated in axenic medium versus OP50 NGM (red downregulated; green  
 329 upregulated gene expression; FPKM > 1 if bolded)

| Transcript Name | Gene Name | Reported (Szewczyk et al., 2006) | RNA-seq (N2)   | RNA-seq (AB1)  |
|-----------------|-----------|----------------------------------|----------------|----------------|
| F59A1.10        | dgat-2    | 2.12±0.16                        | 1.6763         | 1.34785        |
| C18C4.5         | C18C4.5   | 2.09±0.17                        | 1.23525        | 0.338265       |
| T21B10.3        | T21B10.3  | 2.06±0.07                        | 1.21561        | 1.07386        |
| F42H10.7        | ess-2     | 2.23±0.16                        | 0.982566       | 0.33833        |
| K05C4.5         | K05C4.5   | 2.31±0.22                        | 1.08071        | 1.13907        |
| ZK856.9         | zhit-3    | 2.23±0.06                        | 0.315686       | 0.887203       |
| ZC395.8         | ztf-8     | 2.58±0.15                        | 0.639296       | 0.696436       |
| T10F2.3         | ulp-1     | 2.82±0.23                        | 1.28647        | 0.771096       |
| ZK593.8         | fic-1     | 2.96±0.29                        | 0.915745       | 0.0010156      |
| F22B7.5         | dnj-10    | 2.36±0.15                        | 0.302129       | 0.281979       |
| K12D12.1        | top-2     | 2.07±0.12                        | 1.54555        | 1.60623        |
| T07A9.6         | daf-18    | 3.21±0.32                        | 1.61265        | 0.586463       |
| Y39A1A.12       | orc-1     | 2.70±0.15                        | <b>2.0381</b>  | 0.694941       |
| F49E8.2         | oef-1     | 2.27±0.11                        | 1.79849        | 0.96101        |
| ZC317.7         | ZC317.7   | 2.39±0.16                        | 0.367506       | 0.540345       |
| T02B5.1         | cest-1    | 2.78±0.17                        | 1.67789        | <b>2.24475</b> |
| ZK1320.9        | ZK1320.9  | 2.44±0.22                        | 0.231765       | 0.39998        |
| F25D1.1         | ppm-1     | 3.90±0.28                        | 0.708939       | 0.52062        |
| F56A6.1         | sago-2    | 3.88±0.35                        | <b>2.45443</b> | 1.43725        |
| C55B7.1         | glh-2     | 2.46±0.18                        | 1.84883        | 1.80556        |
| C10H11.1        | viln-1    | 2.41±0.20                        | 0.14354        | 0.179035       |
| K07D8.1         | mup-4     | 2.74±0.15                        | 1.1408         | 1.43152        |
| T22B7.7         | T22B7.7   | 4.90±0.20                        | 1.02483        | <b>2.65249</b> |
| F59D8.C         | vit-3     | 3.82±0.38                        | Low reads      | Low reads      |
| C47B2.6         | gale-1    | 3.01±0.24                        | 0.275766       | 1.08986        |
| F02A9.4         | F02A9.4   | 3.63±0.32                        | 1.0187         | 1.01102        |

330

331

332

333

334

335

336

337 **Table S4 Cont'd**338 (b) Genes upregulated in axenic medium versus OP50 NGM (red downregulated; green upregulated  
339 gene expression; FPKM > 1 if bolded)

| Transcript Name | Gene Name | Reported (Szewczyk et al., 2006) | RNA-seq (N2)   | RNA-seq (AB1)  |
|-----------------|-----------|----------------------------------|----------------|----------------|
| R13H8.1a        | daf-16    | 2.11±0.11                        | 0.361921       | 0.22918        |
| T20D3.6         | T20D3.6   | 2.33±0.19                        | 0.621571       | 0.299947       |
| F31E3.6         | F31E3.6   | 2.27±0.16                        | 1.98507        | 0.189954       |
| F35A5.2         | F35A5.2   | 3.95±0.29                        | <b>2.55678</b> | <b>4.4825</b>  |
| C18A11.2        | C18A11.2  | 3.58±0.10                        | <b>2.81051</b> | <b>3.66397</b> |
| C39D10.2        | C39D10.2  | 2.46±0.17                        | 1.30746        | <b>3.62688</b> |
| M03E7.4         | M03E7.4   | 2.31±0.19                        | 1.6438         | <b>2.70823</b> |
| T08G5.10        | mtl-2     | 3.92±0.36                        | 0.243858       | <b>6.35372</b> |
| T10B10.6        | phat-6    | 3.80±0.21                        | <b>2.20061</b> | <b>5.70724</b> |
| F32H5.3         | F32H5.3   | 3.15±0.09                        | <b>3.3075</b>  | <b>2.74311</b> |
| C25E10.8        | C25E10.8  | 2.15±0.14                        | 1.09099        | 1.716          |
| K11G9.6         | mtl-1     | 2.85±0.27                        | 1.52386        | <b>6.75533</b> |
| F18E9.2         | nlp-7     | 2.14±0.18                        | 0.930323       | <b>2.02463</b> |
| F36D3.9         | cpr-2     | 7.64±0.18                        | <b>10.8343</b> | <b>10.2444</b> |
| F54E7.2         | rps-12    | 2.37±0.20                        | 1.25192        | 0.694212       |
| F37C12.9        | rps-14    | 2.28±0.16                        | 0.976764       | 0.221806       |
| F37C12.11       | rps-21    | 2.60±0.20                        | 1.49071        | 0.675332       |
| F39B2.6         | rps-26    | 2.10±0.15                        | 0.912086       | 0.276755       |
| B0412.4         | rps-29    | 2.47±0.16                        | 1.1284         | 0.760152       |
| Y48B6A.2        | rpl-43    | 2.49±0.12                        | 0.284669       | 1.0072         |
| F28F8.3         | lsm-5     | 2.53±0.13                        | 0.929627       | 0.287242       |
| Y46G5.36        | Not found | 2.84±0.11                        | Not found      | Not found      |

340

341

342

343

344

345

346

347

348

349



350 **Table S5. Differentially expressed long (purple), thin (pink), or long and thin (orange) phenotype**  
 351 **genes under CeHR conditions in N2 and AB1 strains**

| <b>N2</b>                                  |                                              | <b>AB1</b>                                 |                                              |
|--------------------------------------------|----------------------------------------------|--------------------------------------------|----------------------------------------------|
| <b>Upregulated in CeHR versus OP50 NGM</b> | <b>Downregulated in CeHR versus OP50 NGM</b> | <b>Upregulated in CeHR versus OP50 NGM</b> | <b>Downregulated in CeHR versus OP50 NGM</b> |
| <i>adt-2</i>                               | <i>egg-6</i>                                 | <i>cki-1</i>                               | <i>acs-1</i>                                 |
| <i>C15A11.2</i>                            | <i>F56F11.4</i>                              |                                            | <i>his-67</i>                                |
| <i>his-3</i>                               | <i>frh-1</i>                                 |                                            | <i>snrp-200</i>                              |
| <i>jph-1</i>                               | <i>his-62</i>                                |                                            | <i>spg-7</i>                                 |
| <i>lon-8</i>                               | <i>his-67</i>                                |                                            | <i>Y105E8A.25</i>                            |
|                                            | <i>rpb-8</i>                                 |                                            |                                              |
|                                            | <i>vps-28</i>                                |                                            |                                              |
|                                            | <i>W05F2.3</i>                               |                                            |                                              |
|                                            | <i>Y95D11A.3</i>                             |                                            |                                              |
|                                            | <i>cyb-2.1</i>                               |                                            |                                              |
|                                            | <i>cyb-2.2</i>                               |                                            |                                              |
|                                            | <i>K08F4.3</i>                               |                                            |                                              |
|                                            | <i>kca-1</i>                                 |                                            |                                              |
|                                            | <i>Y54G9A.5</i>                              |                                            |                                              |

352

353 **Supplementary Dataset Legends**

354 **Supplementary Dataset 1.** Genes with genotype, environment, or genotype-environment  
 355 interaction specific expressions

356 **Supplementary Dataset 2.** Commonly expressed ncRNA molecules in all three experiments

357
